# Supplementary material for: Intergenic Interactions of SBNO1, NFAT5 and GLT8D1 Determine the Susceptibility to Knee Osteoarthritis among Europeans of Russia
Source: MDPI journal article supplement (doi:10.3390/life13020405), 2023-02-01
Supplement: s1 [file s1]

Supplementary Table S3

The allele and genotype frequencies of the studied SNPs in the knee osteoarthritis and control groups

| Chr                                  | SNP        | Gene           | Minor allele | Major allele | Minor allele frequency | Number of the studied chromosomes | Genotype distribution* | H <sub>o</sub> | H <sub>e</sub> | P <sub>HWE</sub> |
|--------------------------------------|------------|----------------|--------------|--------------|------------------------|-----------------------------------|------------------------|----------------|----------------|------------------|
| Knee osteoarthritis patients (n=500) |            |                |              |              |                        |                                   |                        |                |                |                  |
| 1                                    | rs2820436  | <i>LYPLAL1</i> | A            | C            | 0.283                  | 996                               | 38/206/254             | 0.414          | 0.406          | 0.741            |
| 1                                    | rs2820443  | <i>LYPLAL1</i> | C            | T            | 0.268                  | 1000                              | 40/188/272             | 0.376          | 0.392          | 0.362            |
| 2                                    | rs3771501  | <i>TGFA</i>    | A            | G            | 0.433                  | 998                               | 96/240/163             | 0.481          | 0.491          | 0.649            |
| 3                                    | rs11177    | <i>GNL3</i>    | A            | G            | 0.436                  | 1000                              | 97/242/161             | 0.484          | 0.492          | 0.717            |
| 3                                    | rs6976     | <i>GLT8D1</i>  | T            | C            | 0.436                  | 974                               | 97/231/159             | 0.474          | 0.492          | 0.461            |
| 12                                   | rs1060105  | <i>SBNO1</i>   | T            | C            | 0.219                  | 1000                              | 30/159/311             | 0.318          | 0.342          | 0.117            |
| 12                                   | rs56116847 | <i>SBNO1</i>   | A            | G            | 0.340                  | 1000                              | 60/220/220             | 0.440          | 0.449          | 0.690            |
| 16                                   | rs6499244  | <i>NFAT5</i>   | A            | T            | 0.463                  | 998                               | 104/254/141            | 0.509          | 0.497          | 0.653            |
| 16                                   | rs34195470 | <i>WWP2</i>    | A            | G            | 0.476                  | 994                               | 110/253/134            | 0.509          | 0.499          | 0.719            |
| 20                                   | rs143384   | <i>GDF5</i>    | G            | A            | 0.453                  | 996                               | 106/239/153            | 0.480          | 0.496          | 0.471            |
| Control group (n=500)                |            |                |              |              |                        |                                   |                        |                |                |                  |
| 1                                    | rs2820436  | <i>LYPLAL1</i> | A            | C            | 0.325                  | 1000                              | 56/213/231             | 0.426          | 0.439          | 0.541            |
| 1                                    | rs2820443  | <i>LYPLAL1</i> | C            | T            | 0.260                  | 968                               | 41/170/273             | 0.351          | 0.385          | 0.059            |
| 2                                    | rs3771501  | <i>TGFA</i>    | A            | G            | 0.420                  | 996                               | 98/222/178             | 0.446          | 0.487          | 0.066            |
| 3                                    | rs11177    | <i>GNL3</i>    | A            | G            | 0.476                  | 1000                              | 113/250/137            | 0.500          | 0.499          | 1.000            |
| 3                                    | rs6976     | <i>GLT8D1</i>  | T            | C            | 0.481                  | 950                               | 111/235/129            | 0.495          | 0.499          | 0.854            |
| 12                                   | rs1060105  | <i>SBNO1</i>   | T            | C            | 0.212                  | 1000                              | 27/158/315             | 0.316          | 0.334          | 0.229            |
| 12                                   | rs56116847 | <i>SBNO1</i>   | A            | G            | 0.357                  | 996                               | 71/214/213             | 0.430          | 0.459          | 0.145            |
| 16                                   | rs6499244  | <i>NFAT5</i>   | A            | T            | 0.457                  | 1000                              | 114/229/157            | 0.458          | 0.496          | 0.087            |
| 16                                   | rs34195470 | <i>WWP2</i>    | A            | G            | 0.476                  | 998                               | 112/251/136            | 0.503          | 0.499          | 0.929            |
| 20                                   | rs143384   | <i>GDF5</i>    | G            | A            | 0.422                  | 1000                              | 97/228/175             | 0.456          | 0.488          | 0.143            |

Note: \* minor allele homozygotes / heterozygotes / major allele homozygotes
