# Supplementary material for: Intergenic Interactions of SBNO1, NFAT5 and GLT8D1 Determine the Susceptibility to Knee Osteoarthritis among Europeans of Russia
Source: MDPI journal article supplement (doi:10.3390/life13020405), 2023-02-01
Supplement: s1 [file s1]

Supplementary Table S4

Genotype combinations associated with knee osteoarthritis \*

| Model                          | N  | Genotype combinations                                            | <i>beta</i>  | P              | Risk.<br>High/Low |
|--------------------------------|----|------------------------------------------------------------------|--------------|----------------|-------------------|
| Two-order interaction models   |    |                                                                  |              |                |                   |
| 1                              | 1  | GG (rs11177)xCC (rs2820436)                                      | 0.42         | 0.027          | H                 |
|                                | 2  | AG (rs11177)xAA (rs2820436)                                      | -1.08        | 0.002          | L                 |
| 2                              | 3  | TT (rs6499244)xAG (rs56116847)                                   | -0.55        | 0.007          | L                 |
| 3                              | 4  | AG (rs34195470)xCC (rs6976)                                      | 0.40         | 0.040          | H                 |
|                                | 5  | AA (rs34195470)xTT (rs6976)                                      | -0.79        | 0.026          | L                 |
| 4                              | 6  | TT (rs6976)xTT (rs2820443)                                       | -0.46        | 0.023          | L                 |
|                                | 7  | TT (rs6976)xCT (rs2820443)                                       | 0.54         | 0.044          | H                 |
| 5                              | 8  | CC (rs6976)xCC (rs2820436)                                       | 0.47         | 0.016          | H                 |
|                                | 9  | CT (rs6976)xAA (rs2820436)                                       | -0.98        | 0.005          | L                 |
| Three-order interaction models |    |                                                                  |              |                |                   |
| 1                              | 1  | TT (rs6499244)xGG (rs56116847)xCT (rs6976)                       | 0.56         | 0.042          | H                 |
|                                | 2  | AA (rs6499244)xGG (rs56116847)xCT (rs6976)                       | -1.10        | 0.003          | L                 |
|                                | 3  | <b>TT (rs6499244)xAG (rs56116847)xCT (rs6976)</b>                | <b>-1.14</b> | <b>0.00003</b> | <b>L</b>          |
|                                | 4  | TT (rs6499244)xGG (rs56116847)xTT (rs6976)                       | -0.81        | 0.044          | L                 |
|                                | 5  | AT (rs6499244)xAA (rs56116847)xTT (rs6976)                       | -1.80        | 0.024          | L                 |
| 2                              | 6  | TT (rs6499244)xGG (rs56116847)xAG (rs11177)                      | 0.66         | 0.019          | H                 |
|                                | 7  | AA (rs6499244)xGG (rs56116847)xAG (rs11177)                      | -1.01        | 0.008          | L                 |
|                                | 8  | <b>TT (rs6499244)xAG (rs56116847)xAG (rs11177)</b>               | <b>-1.07</b> | <b>0.00009</b> | <b>L</b>          |
|                                | 9  | AT (rs6499244)xAA (rs56116847)xAA (rs11177)                      | -1.80        | 0.024          | L                 |
|                                | 10 | AA (rs6499244)xAA (rs56116847)xAA (rs11177)                      | -1.59        | 0.044          | L                 |
| Four-order interaction models  |    |                                                                  |              |                |                   |
| 1                              | 1  | TT(rs6499244)xGG (rs56116847)xCT (rs6976)xTT (rs2820443)         | 0.91         | 0.015          | H                 |
|                                | 2  | <b>TT(rs6499244)xAG (rs56116847)xCT (rs6976)xTT (rs2820443)</b>  | <b>-1.60</b> | <b>0.00003</b> | <b>L</b>          |
|                                | 3  | TT (rs6499244)xGG (rs56116847)xTT (rs6976)xTT (rs2820443)        | -2.02        | 0.009          | L                 |
|                                | 4  | AT (rs6499244)xAA (rs56116847)xTT (rs6976)xTT (rs2820443)        | -1.61        | 0.048          | L                 |
|                                | 5  | AA (rs6499244)xGG (rs56116847)xCT (rs6976)xCT (rs2820443)        | -1.15        | 0.033          | L                 |
| 2                              | 6  | AA(rs6499244)xGG (rs56116847)xCC (rs1060105)xCT (rs6976)         | -1.65        | 0.012          | L                 |
|                                | 7  | TT(rs6499244)xAG (rs56116847)xCC (rs1060105)xCT (rs6976)         | -0.15        | 0.0005         | L                 |
|                                | 8  | TT(rs6499244)xGG (rs56116847)xCT (rs1060105)xCT (rs6976)         | 1.06         | 0.011          | H                 |
|                                | 9  | TT(rs6499244)xAG (rs56116847)xCT (rs1060105)xCT (rs6976)         | -1.01        | 0.032          | L                 |
| 3                              | 10 | TT(rs6499244)xGG (rs56116847)xAG (rs11177)xTT (rs2820443)        | 1.12         | 0.004          | H                 |
|                                | 11 | <b>TT(rs6499244)xAG (rs56116847)xAG (rs11177)xTT (rs2820443)</b> | <b>-1.58</b> | <b>0.00005</b> | <b>L</b>          |

|   |           |                                                                |              |                |          |
|---|-----------|----------------------------------------------------------------|--------------|----------------|----------|
|   |           | <b>(rs2820443)</b>                                             |              |                |          |
|   | 12        | TT (rs6499244)xGG (rs56116847)xAA (rs11177)xTT (rs2820443)     | -1.38        | 0.018          | L        |
|   | 13        | AT (rs6499244)xAA (rs56116847)xAA (rs11177)xTT (rs2820443)     | -1.61        | 0.048          | L        |
|   | 14        | AA (rs6499244)xGG (rs56116847)xGG (rs11177)xCT (rs2820443)     | 2.99         | 0.005          | H        |
|   | 15        | AT (rs6499244)x AG (rs56116847)xAA (rs11177)xCT (rs2820443)    | 1.20         | 0.021          | H        |
| 4 | 16        | TT (rs6499244)xAG (rs34195470)xGG (rs56116847)xCT (rs6976)     | 1.18         | 0.004          | H        |
|   | 17        | AA (rs6499244)xAG (rs34195470)xGG (rs56116847)xCT (rs6976)     | -2.01        | 0.011          | L        |
|   | 18        | TT (rs6499244)xAG (rs34195470)xAG (rs56116847)xCT (rs6976)     | -1.45        | 0.0003         | <b>L</b> |
|   | 19        | TT (rs6499244)xAG (rs34195470)xGG (rs56116847)xTT (rs6976)     | -1.91        | 0.015          | L        |
|   | 20        | AT (rs6499244)xGG (rs34195470)xAG (rs56116847)xCT (rs6976)     | 2.42         | 0.027          | L        |
| 5 | 21        | TT (rs6499244)xGG (rs56116847)xAG (rs11177)xCT (rs6976)        | 0.66         | 0.019          | L        |
|   | 22        | AA (rs6499244)xGG (rs56116847)xAG (rs11177)xCT (rs6976)        | -1.01        | 0.008          | L        |
|   | <b>23</b> | <b>TT (rs6499244)xAG (rs56116847)xAG (rs11177)xCT (rs6976)</b> | <b>-1.11</b> | <b>0.00006</b> | <b>L</b> |
|   | 24        | TT (rs6499244)xGG (rs56116847)xAA (rs11177)xTT (rs6976)        | -0.81        | 0.044          | L        |
|   | 25        | AT (rs6499244)xAA (rs56116847)xAA (rs11177)xTT (rs6976)        | -1.80        | 0.024          | L        |
|   | 26        | AA (rs6499244)xAA (rs56116847)xAA (rs11177)xTT (rs6976)        | -1.58        | 0.044          | L        |

\* Genotype combinations are derived from the interaction models obtained by the MB-MDR method and described in tables 3
