# Supplementary material for: Intergenic Interactions of SBNO1, NFAT5 and GLT8D1 Determine the Susceptibility to Knee Osteoarthritis among Europeans of Russia
Source: MDPI journal article supplement (doi:10.3390/life13020405), 2023-02-01
Supplement: s1 [file s1]

Supplementary Table S1

The literature data about associations of the studied polymorphisms of the candidate genes with osteoarthritis

| Chr | SNP       | Gene           | Phenotype      | Association, significance<br>(associated allele/genotype/<br>haplotype) | Reference                   |
|-----|-----------|----------------|----------------|-------------------------------------------------------------------------|-----------------------------|
| 1   | rs2820436 | <i>LYPLALI</i> | HOA            | OR=0.93, p=9.4x10 <sup>-09</sup> (C)                                    | Styrkarsdottir et al., 2018 |
|     |           |                | OA             | OR=0.93, p=2.01x10 <sup>-09</sup> (C)                                   | Zengini et al., 2018        |
|     |           |                | KOA and/or HOA | OR=0.95, p=2.44x10 <sup>-09</sup> (C)                                   | Tachmazidou et al., 2019    |
| 1   | rs2820443 | <i>LYPLALI</i> | KOA and/or HOA | OR=1.06, p=6.01x10 <sup>-11</sup> (C)                                   | Tachmazidou et al. 2019     |
| 2   | rs3771501 | <i>TGFA</i>    | HOA            | OR=0.93, p=1.7 x10 <sup>-08</sup> (G)                                   | Styrkarsdottir et al., 2018 |
|     |           |                | OA             | OR=0.94, p=1.66 x10 <sup>-08</sup> (G)                                  | Zengini et al., 2018        |
|     |           |                | KOA and/or HOA | OR=0.95, p=1.84 x10 <sup>-12</sup> (G)                                  | Tachmazidou et al., 2019    |
|     |           |                | HOA            | OR=0.92, p=1.05 x10 <sup>-13</sup> (G)                                  | Tachmazidou et al., 2019    |
|     |           |                | OA             | OR=0.96, p=4.24x10 <sup>-16</sup> (G)                                   | Tachmazidou et al., 2019    |
|     |           |                | Hand OA        | OR=1.08, p=1.9 x10 <sup>-10</sup> (A)                                   | Boer et al., 2021           |
|     |           |                | THR            | OR=1.07, p=1.6 x10 <sup>-10</sup> (A)                                   | Boer et al., 2021           |
|     |           |                | TJR            | OR=1.06, p=8.3 x10 <sup>-11</sup> (A)                                   | Boer et al., 2021           |
|     |           |                | KOA and/or HOA | OR=1.04, p=8.8 x10 <sup>-13</sup> (A)                                   | Boer et al., 2021           |
|     |           |                | HOA            | OR=1.07, p=6.6 x10 <sup>-13</sup> (A)                                   | Boer et al., 2021           |
|     |           |                | OA             | OR=1.04, p=4.05x10 <sup>-15</sup> (A)                                   | Boer et al., 2021           |
| 3   | rs11177   | <i>GNL3</i>    | OA             | OR=1.09, p=5.13 x10 <sup>-09</sup> (A)                                  | Zeggini et al., 2012        |
|     |           |                | TJR            | OR=1.12, p=1.25 x10 <sup>-10</sup> (A)                                  | Zeggini et al., 2012        |
|     |           |                | HOA            | OR=1.07, p=6.5 x10 <sup>-08</sup> (A)                                   | Styrkarsdottir et al., 2018 |
| 3   | rs6976    | <i>GLT8D1</i>  | OA             | OR=1.09, p=6.56 x10 <sup>-09</sup> (T)                                  | Zeggini et al., 2012        |
|     |           |                | TJR            | OR=1.12, p=7.24 x10 <sup>-11</sup> (T)                                  | Zeggini et al., 2012        |
|     |           |                | HOA            | OR=1.07, p=4.5 x10 <sup>-08</sup> (T)                                   | Styrkarsdottir et al., 2018 |
|     |           |                | KOA and/or HOA | OR=1.05, p=2.04 x10 <sup>-10</sup> (T)                                  | Tachmazidou et al., 2019    |

|    |            |              |                |                                        |                             |
|----|------------|--------------|----------------|----------------------------------------|-----------------------------|
|    |            |              | HOA            | OR=1.08, p=3.10 x10 <sup>-11</sup> (T) | Tachmazidou et al., 2019    |
| 12 | rs1060105  | <i>SBNO1</i> | KOA            | OR=1.07, p=1.9x10 <sup>-08</sup> (C)   | Styrkarsdottir et al., 2018 |
| 12 | rs56116847 | <i>SBNO1</i> | KOA            | OR=1.06, p=3.19x10 <sup>-10</sup> (A)  | Tachmazidou et al., 2019    |
| 16 | rs6499244  | <i>NFAT5</i> | KOA            | OR=1.06, p=3.88x10 <sup>-11</sup> (A)  | Tachmazidou et al., 2019    |
| 20 | rs34195470 | <i>WWP2</i>  | KOA            | OR=1.07, p=2.7x10 <sup>-11</sup> (G)   | Styrkarsdottir et al., 2018 |
|    |            |              | TKR            | OR=0.93, p=3.2x10 <sup>-10</sup> (A)   | Boer et al., 2021           |
|    |            |              | KOA            | OR=0.95, p=3.1x10 <sup>-13</sup> (A)   | Boer et al., 2021           |
| 20 | rs143384   | <i>GDF5</i>  | OA             | OR=1.05, p=2.1x10 <sup>-10</sup> (A)   | Styrkarsdottir et al., 2018 |
|    |            |              | KOA            | OR=1.10, p=1.4x10 <sup>-19</sup> (A)   | Styrkarsdottir et al., 2018 |
|    |            |              | KOA            | OR=0.91, p=4.2x10 <sup>-23</sup> (G)   | Styrkarsdottir et al., 2019 |
|    |            |              | KOA            | OR=1.1, p=4.77x10 <sup>-23</sup> (A)   | Tachmazidou et al., 2019    |
|    |            |              | OA             | OR=1.03, p=3.04x10 <sup>-11</sup> (A)  | Boer et al., 2021           |
|    |            |              | TJR            | OR=1.06, p=5.9x10 <sup>-12</sup> (A)   | Boer et al., 2021           |
|    |            |              | TKR            | OR=1.10, p=6.2x10 <sup>-15</sup> (A)   | Boer et al., 2021           |
|    |            |              | KOA and/or HOA | OR=1.06, p=1.2x10 <sup>-20</sup> (A)   | Boer et al., 2021           |
|    |            |              | KOA            | OR=1.07, p=1.01x10 <sup>-23</sup> (A)  | Boer et al., 2021           |

Note: OA–osteoarthritis; KOA–knee osteoarthritis; HOA–hip osteoarthritis; KOA and/or HOA–knee and/or hip osteoarthritis; TKR–total knee replacement; THR–total hip replacement; TJR–total joint replacement.
